# Supplementary material for: (S)-1-Methyl-2-Oxoimidazolidine-4-Carboxylic Acid
Source: Preprints.org preprint supplement (doi:10.20944/preprints202405.1782.v1), 2024-05-27
Supplement: Supplementary file 1 [file supplementary]

*Supplementary Materials*

(*S*)-1-Methyl-2-oxoimidazolidine-4-carboxylic acid

Ashley L. Dey, Majid Motevalli, Isaac Abrahams and Peter B. Wyatt*

Department of Chemistry, Joseph Priestley Building, Queen Mary University of London, Mile End Road, London UK E1 4NS

*****Correspondence: p.b.wyatt@qmul.ac.uk

**Contents**

Figure S1: 1H NMR spectrum of (*S*)-1-methyl-2-oxoimidazolidine-4-carboxylic acid 1(400 MHz, D2O)

Figure S2: 13C NMR spectrum of (*S*)-1-methyl-2-oxoimidazolidine-4-carboxylic acid 1(100.6 MHz, D2O)

Figure S3: ESI mass spectrum of (*S*)-1-methyl-2-oxoimidazolidine-4-carboxylic acid 1

Figure S1: 1H NMR spectrum of (*S*)-1-methyl-2-oxoimidazolidine-4-carboxylic acid 1(400 MHz, D2O)

Figure S2: 13C NMR spectrum of (*S*)-1-methyl-2-oxoimidazolidine-4-carboxylic acid 1(100.6 MHz, D2O)

Figure S3: ESI mass spectrum of (*S*)-1-methyl-2-oxoimidazolidine-4-carboxylic acid 1
